# Supplementary material for: Effect of Intrapersonal and Interpersonal Behavior Change Strategies on Physical Activity Among Older Adults: A Randomized Clinical Trial
Source: PubMed Central journal article supplement (PMC10905305; doi:10.1001/jamanetworkopen.2024.0298), 2024-02-29
Supplement: jamanetwopen-e240298-s003.pdf [file jamanetwopen-e240298-s003.pdf]

## Data Sharing Statement

McMahon. Effect of Intrapersonal and Interpersonal Behavior Change Strategies on Physical Activity Among Older Adults. *JAMA Netw Open*. Published February 29, 2024.

doi:10.1001/jamanetworkopen.2024.0298

### Data

**Data available:** Yes

**Data types:** Deidentified participant data, Data dictionary

**How to access data:** [skmcmaho@umn.edu](mailto:skmcmaho@umn.edu) URL of UMN Data Repository (DRUM) will be made available upon publication

**When available:** With publication

### Supporting Documents

**Document types:** None

### Additional Information

**Who can access the data:** Once in DRUM, data are available for immediate download. Users may contact the author with questions regarding the data.

**Types of analyses:** Individual level data

**Mechanisms of data availability:** Users can access data on the UMN DRUM website after publication

**Any additional restrictions:** Users are expected to abide by the University of Minnesota Acceptable Use Policy, and other University policies, where applicable. However, by using or downloading the data, you signify your agreement to the conditions of use stated below: The user will not make any use of data to identify or otherwise infringe the privacy or confidentiality rights of individuals discovered inadvertently or intentionally in the data. The user will give appropriate attribution to the author(s) of the data in any publication that employs resources provided by the Data Repository. If your use or publication requires permission, you must contact the authors directly; administrators of the Data Repository cannot respond to requests for permission.
